# Supplementary material
Source: Springer Nature journal article supplement (https://www.springermedizin.de/resource/supplementary/12889_2012_4768_MOESM4_ESM.pdf/9493712)
Supplement: MOESM4 [file 9493712]

## Antibiotic use

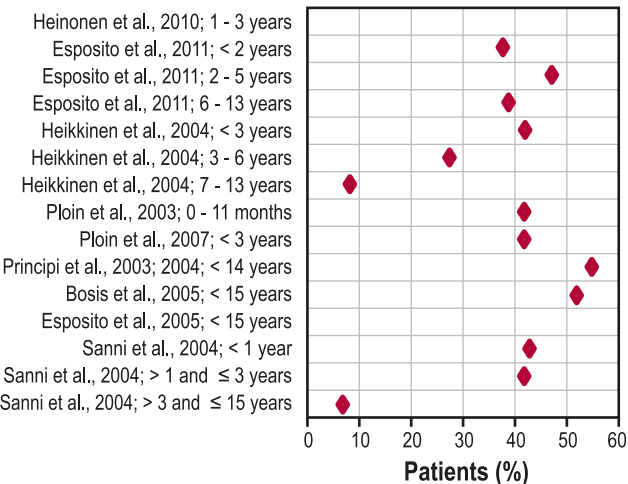

## Antipyretic/symptomatic

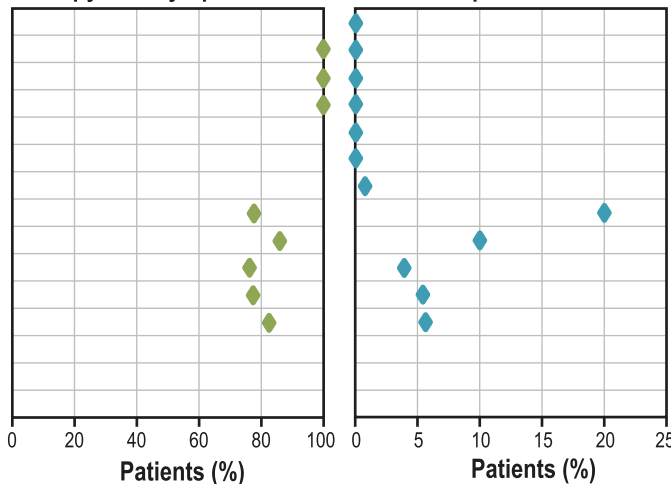

## Hospitalisation

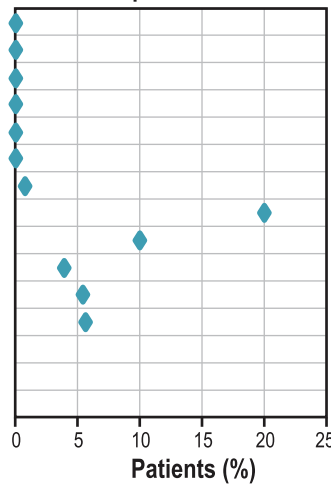

| Study                                           | Patient Age        | Influenza Cases | Country | Setting             | Study Duration                                                   |
|-------------------------------------------------|--------------------|-----------------|---------|---------------------|------------------------------------------------------------------|
| Heinonen et al., 2010                           | 1 - 3 years        | 61              | Finland | Primary care        | 14 January – 9 April 2008 and<br>7 January – 26 March 2009       |
| Esposito et al., 2011                           | < 2 years          | 343             | Italy   | Primary care        | 1 November 2008 – 30 April 2009                                  |
|                                                 | 2 - 5 years        | 1071            |         |                     |                                                                  |
|                                                 | 6 - 13 years       | 729             |         |                     |                                                                  |
| Heikkinen et al., 2004                          | < 3 years          | 133             | Finland | Community           | 9 October 2000 – 20 May 2001 and<br>1 October 2001 – 19 May 2002 |
|                                                 | 3 - 6 years        | 148             |         |                     |                                                                  |
|                                                 | 7 - 13 years       | 91              |         |                     |                                                                  |
| Ploin et al., 2003                              | 0 - 11 months      | 99              | France  | ED                  | Weeks 3 to 6 in 2002                                             |
| Ploin et al., 2007                              | < 3 years          | 283             | France  | ED                  | Weeks 3 to 6 in 2002                                             |
| Principi et al., 2003,<br>Principi et al., 2004 | < 14 years         | 352             | Italy   | Primary care and ED | 1 November 2001 – 30 April 2002                                  |
| Bosis et al., 2005                              | < 15 years         | 223             | Italy   | ED                  | 1 November 2002 – 31 March 2003                                  |
| Esposito et al., 2005                           | < 15 years         | 234             | Italy   | ED                  | 1 November 2002 – 31 March 2003                                  |
| Sanni et al., 2004                              | < 1 year           | 14              | France  | Hospital            | 1 January – 6 February 2002                                      |
|                                                 | > 1 and ≤ 3 years  | 31              |         |                     |                                                                  |
|                                                 | > 3 and ≤ 15 years | 14              |         |                     |                                                                  |
